# Supplementary material for: Auranofin Resistance in Toxoplasma gondii Decreases the Accumulation of Reactive Oxygen Species but Does Not Target Parasite Thioredoxin Reductase
Source: PubMed Central journal article supplement (PMC8017268; doi:10.3389/fcimb.2021.618994), 2021-03-19
Supplement: Table_1.pdf [file Table_1.pdf]

| Name          | Gene ID* | Sequence                                       | Function                                  |
|---------------|----------|------------------------------------------------|-------------------------------------------|
| TrxR 12F      | 309730   | GGACCTATGAGTTGCCTCTCTG                         | TrxR amplification 5' half                |
| TrxR R10      | 309730   | GTCAAATCCCAATTCGCGGAG                          | TrxR amplification, 5' half               |
| TrxR For 8    | 309730   | GTCTGCTCTCTCTGTTTCGCAAG                        | TrxR amplification, 3' half               |
| TrxR Rev 9    | 309730   | CCTCCACATCCTCCAGAAGC                           | TrxR amplification, 3' half               |
| 5TrxR 1R      | 309730   | CGAGTTTTCTAGAGCGTGTGC                          | TrxR sequencing, 5' half, exon 1          |
| 5TrxR 1F      | 309730   | CATCCCTGTGCACTTTCC                             | TrxR sequencing, 5' half, exons 2-3       |
| 5TrxR 3F      | 309730   | GTGGATACCCTCGTATAATATGC                        | TrxR sequencing, 5' half, exons 4-5       |
| TrxR For 8    | 309730   | GTCTGCTCTCTCTGTTTCGCAAG                        | TrxR sequencing, 3' half, exons 6-7       |
| 3TrxR 2F      | 309730   | GCTTCGTTTGATTGCCTGTC                           | TrxR sequencing, 3' half, exons 8-9       |
| 3TrxR 3F      | 309730   | CATCTTGTTCCCTCCAACCTCTG                        | TrxR sequencing, 3' half, exon 10         |
| 3TrxR 4F      | 309730   | GATGTCTGCTTTTCGTCTTCC                          | TrxR sequencing, 3' half, exon 11         |
| SOD LIC3      | 316330   | TACTTCCAATCCAATTTACGAAGGTGAGGAGCATTCCG         | SOD2 amplification with LIC cassette      |
| SOD LIC5      | 316330   | TCCTCCACTTCCAATTTAGCGTTGCTTTCAAGTGCTTT<br>CACC | SOD2 amplification with LIC cassette      |
| SOD2 RE Ins F | 316330   | TGATAAGCTAGCCAGTGATCT                          | Site directed mutagenesis for NheI        |
| SOD2 RE Ins R | 316330   | TCTCCATCTCCCCCTGAT                             | Site directed mutagenesis for NheI        |
| SOD2 SNP F    | 316330   | TTTTCAAACCAGCGGCAGGC                           | Site directed mutagenesis for L201P       |
| SOD2 SNP R    | 316330   | CTCATCCTTGAACCTGGGC                            | Site directed mutagenesis for L201P       |
| SOD Seq1      | 316330   | CTTTCGAATCCTGAAACACC                           | Validation of SOD2 SNV                    |
| SOD Seq2      | 316330   | GTCATGTGTGTTTGCCCCGTAG                         | Validation of SOD2 SNV                    |
| SOD2 F        | 316330   | GCAGAGACTCTTCGCTTTTAC                          | Amplification of SOD2.YFP CRISPR<br>clone |
| AmpR          | N/A      | CCTTGAAGAAGATGGTGCGC                           | Amplification of SOD2.YFP CRISPR<br>clone |
| SOD E2        | 316330   | GCTTCATTCAAGGCACACC                            | Amplification of SOD2 in CRISPR<br>clone  |
| SOD R         | 316330   | CTATCCAGGGTTCACGACG                            | Amplification of SOD2 in CRISPR<br>clone  |
| CDS F         | 300120   | GTGTGTCTGCATCGTTTCC                            | Aminotransferase amplification            |
| CDS R         | 300120   | GTTCCCTCTGAAGCATGTTTCC                         | Aminotransferase amplification            |
| CDS E1        | 300120   | CTCTGTTTGGTGTCTTTGACC                          | Aminotransferase SNV sequencing           |
| COR F         | 253120   | CTCAGCAATGTGACATGCTAGC                         | Mandelonitrile lysase amplification       |
| COR R         | 253120   | GTTTCGACGGTGAAATGTGCTC                         | Mandelonitrile lysase amplification       |
| COR E8        | 253120   | CTTGCTACCATTTCTCCTCG                           | Mandelonitrile lysase SNV                 |
| MBL F         | 234250   | GTGAACTCAGTGAAACCGC                            | MAEBL amplification                       |

|          |        |                        |                                   |
|----------|--------|------------------------|-----------------------------------|
| MBL R    | 234250 | GCACTCTCGAGTTTTACGC    | MAEBL amplification               |
| MBL E2   | 234250 | GGAGGATCAGGTTTATGAGTGC | MAEBL SNV sequencing              |
| NAD F    | 244700 | CGTCTCCTTCTCTCGATGG    | NAD(+)/NADH kinase amplification  |
| NAD R    | 244700 | CGTGAACCTTAATGGATGGCG  | NAD(+)/NADH kinase amplification  |
| NAD E7   | 244700 | CTTCCCAGTTCTTTCTCTCC   | NAD(+)/NADH kinase SNV            |
| SOD F    | 316330 | CCTCTCGAGCAGTTTACTCG   | SOD2 amplification                |
| SOD R    | 316330 | CTATCCAGGGTTCACGACG    | SOD2 amplification                |
| SOD E2   | 316330 | GCTTCATTCAAGGCACACC    | SOD2 SNV sequencing               |
| SOD E1   | 316330 | CATCTTCGCGTTTCCTGC     | SOD2 SNV sequencing               |
| SWI F    | 245720 | GTTTCCTCGTCTGTGCAC     | SWI2/SNF2 amplification           |
| SWI R    | 245720 | GTTATTCACTATCCCAGGCAC  | SWI2/SNF2 amplification           |
| SWI E2   | 245720 | GTGTGTGTCAAGAGGTCG     | SWI2/SNF2 SNV sequencing          |
| TPR F    | 268870 | CCGAGAAAGTGAATTGCC     | Tetratricopeptide amplification   |
| TPR R    | 268870 | CACACACACACAGAAACG     | Tetratricopeptide amplification   |
| TPR E4-2 | 268870 | CCAAGTGTCCGGTGTCTC     | Tetratricopeptide SNV sequencing  |
| ZnC F    | 311100 | CCTGCATTCTACAATAGGCGC  | Zn finger CCCH type amplification |
| ZnC R    | 311100 | GTTTCAGAAGCAGCTCCTGG   | Zn finger CCCH type amplification |
| ZnC 4F   | 311100 | CAAGCACGCCAATCACTAG    | Zn finger CCCH type SNV           |

\*Gene ID # in Table 1.
